# Supplementary material
Source: PubMed Central journal article supplement (PMC5692561)
Supplement: pnas.201710254SI.pdf [file pnas.201710254SI.pdf]

# Supporting Information

Mo et al. 10.1073/pnas.1710254114

## SI Materials and Methods

**Generation of UAS:Gal4 Fish.** A sequence encoding for the Gal4-activator (KalTA4) was inserted within the 5' UTR of *ltk*, *aug-α1*, *aug-α2*, and *aug-β* genes. To do so, embryos carrying *sox10:mCherry* and *UAS:eGFP* transgenes were injected at the single-cell stage with a mixture containing (i) sgRNAs targeting specific 5' UTR sequences near the endogenous gene's start codon; and (ii) Cas9 mRNA; (iii) a donor plasmid with the equivalent 5' UTR sequence followed by a viral 2A peptide and KalTA4 (32). The donor plasmid, which is based upon Auer et al. (33), was specifically inserted into the 5' UTR of the *ltk* and *augmentor* genes using two sgRNAs specific to that region as previously described. This donor plasmid includes a coding sequence of the transcriptional transactivator Gal4 (KalTA4) preceded by an E2A peptide linker for multicistronic expression. Upon injection of the above mixture into a *UAS:eGFP* transgenic fish, Cas9 cleaves the genomic locus as well as the donor plasmid sequence as specified by the sgRNAs. DNA repair triggers integration of the donor plasmid into the genomic locus through nonspecific ligation of cleaved DNA. Since the indel sequence preceding the Gal4-cDNA cannot be predicted upon integration, the presence of the E2A will allow the in-frame insertions of the Gal4-cDNA (33).

**Determination of On-Targets and Off-Targets.** Genomic DNA from zebrafish embryos at 24 hpf and from the tails of adult fish was extracted by boiling at 95 °C for 20 min in 50 μL of 100 mM sodium hydroxide and then neutralized with 10 μL of 1 M Tris-HCl (pH 7.5). Then 1 μL of genomic DNA was used as template to amplify an ~200-bp sequence surrounding the on-target and off-target regions identified by CRISPR RGEN Tools ([www.rgenome.net](http://www.rgenome.net)) (Fig. S24). Mutations were detected by T7EI assay (31). Mutation frequencies were determined by quantifications of T7EI-undigested and -digested PCR products. For each quantification, the intensity of the PCR bands of the undigested product and of a T7EI-digested fragment of the same size were analyzed by ImageJ (<https://imagej.nih.gov/ij/>). The

mutation frequencies were calculated by the ratio of T7EI-digested to T7EI-undigested PCR products.

**Sox10<sup>+</sup> Cell Isolation.** Sox10<sup>+</sup> cells were isolated from Sox10:mCherry by using FACS. Sox10:mCherry transgenic zebrafish embryos are embryos expressing mCherry as driven by the *sox10* promoter. mCherry-positive and -negative cells were separated as described previously (41). Briefly, 16-hpf and 24-hpf *sox10:mCherry* embryos and age-matched wild-type embryos were collected and dechorionated, and the yolk was mechanically removed and disassociated with pronase followed by further digestion to single cells with Librase (Roche) at 28 °C for 10 min then trypsin (Gibco) for 5 min. The reaction was terminated by the addition of FBS. Cells were pelleted, washed with suspension buffer containing Leibovitz medium, 0.8 mM calcium chloride, penicillin streptomycin, and 0.5% FBS (all from Gibco), and filtered with a 35-μm cell strainer into 5-mL FACS tubes. FACS was performed by a five-laser BD FACSAria II cell sorter equipped with BD FACSDiva software v8.0.1 (BD Biosciences). DAPI was added to the sample before FACS to collect only viable cells. Viable mCherry-positive and -negative cells were sorted using a 70-μm nozzle at 60 psi. Sorted cells were collected, and total RNA was extracted using TRIzol reagent (Life Technologies).

**Whole-Mount in Situ Hybridization.** Zebrafish embryos at different stages were fixed, and whole-mount in situ hybridization was performed as previously described (42). To make riboprobes, fragments for riboprobe synthesis were amplified from wild-type full-length zebrafish cDNA and cloned into pBluescript II KS (-) (Agilent Technologies). To generate digoxigenin (DIG)-labeled antisense riboprobes, linearized constructs were reverse transcribed by T3 RNA polymerase with a DIG Labeling Kit (Roche). Meanwhile, sense-sequence riboprobes were generated using T7 RNA polymerase with the DIG Labeling Kit. The DIG signal was revealed by the NBT/BCIP system (Roche), and images were acquired with Leica Application Suite (Leica) using the Leica MacroFluo system and Leica LED5000RL light (Leica).

A

Full-Length Augmentors

|                  |     |                                                        |     |
|------------------|-----|--------------------------------------------------------|-----|
| zebrafish_Aug_a1 | 1   | -----                                                  | 12  |
| zebrafish_Aug_a2 | 1   | -----                                                  | 59  |
| zebrafish_Aug_b  | 1   | -----                                                  | 12  |
| zebrafish_Aug_a1 | 13  | LVLLCTAAQSDASAKVETLREHREHRENSADDESA-----QRTSAPFPHPT    | 65  |
| zebrafish_Aug_a2 | 60  | LVLLCTAAQSDASAKVETLREHREHRENSADDESA-----QRTSAPFPHPT    | 114 |
| zebrafish_Aug_b  | 13  | LVLLCTAAQSDASAKVETLREHREHRENSADDESA-----QRTSAPFPHPT    | 72  |
| zebrafish_Aug_a1 | 66  | -HHLKTAGSTLLEFPRDLRREKRETTLLDGLVYGPCKKDDVYLYNTRDCTIPAH | 123 |
| zebrafish_Aug_a2 | 117 | -HHLKTAGSTLLEFPRDLRREKRETTLLDGLVYGPCKKDDVYLYNTRDCTIPAH | 174 |
| zebrafish_Aug_b  | 73  | -HHLKTAGSTLLEFPRDLRREKRETTLLDGLVYGPCKKDDVYLYNTRDCTIPAH | 132 |
| zebrafish_Aug_a1 | 124 | YKRCARLLRLAGSQRTE--                                    | 143 |
| zebrafish_Aug_a2 | 176 | YKRCARLLRLAGSQRTE--                                    | 195 |
| zebrafish_Aug_b  | 133 | YKRCARLLRLAGSQRTE--                                    | 152 |

Full-Length Aug-a

|                  |     |                                                           |     |
|------------------|-----|-----------------------------------------------------------|-----|
| human_AUG_a      | 1   | -----                                                     | 11  |
| zebrafish_AUG_a1 | 1   | -----                                                     | 12  |
| zebrafish_AUG_a2 | 1   | -----                                                     | 59  |
| human_AUG_a      | 12  | LVLLCTAAQSDASAKVETLREHREHRENSADDESA-----QRTSAPFPHPT       | 69  |
| zebrafish_AUG_a1 | 13  | LVLLCTAAQSDASAKVETLREHREHRENSADDESA-----QRTSAPFPHPT       | 69  |
| zebrafish_AUG_a2 | 60  | LVLLCTAAQSDASAKVETLREHREHRENSADDESA-----QRTSAPFPHPT       | 114 |
| human_AUG_a      | 70  | RKAAAGLSPSPORVETVPRDLRREKRETTLLDGLVYGPCKKDDVYLYNTRDCTIPAH | 129 |
| zebrafish_AUG_a1 | 64  | DV-HHLKTAGSTLLEFPRDLRREKRETTLLDGLVYGPCKKDDVYLYNTRDCTIPAH  | 122 |
| zebrafish_AUG_a2 | 115 | DV-HHLKTAGSTLLEFPRDLRREKRETTLLDGLVYGPCKKDDVYLYNTRDCTIPAH  | 174 |
| human_AUG_a      | 130 | YKRCARLLRLAGSQRTE--                                       | 152 |
| zebrafish_AUG_a1 | 123 | YKRCARLLRLAGSQRTE--                                       | 143 |
| zebrafish_AUG_a2 | 175 | YKRCARLLRLAGSQRTE--                                       | 195 |

Percent Identity Matrix - created by Clustal2.1

|                     |        |        |        |
|---------------------|--------|--------|--------|
| 1: human_AUG_a      | 100.00 | 44.29  | 48.97  |
| 2: zebrafish_AUG_a1 | 44.29  | 100.00 | 50.70  |
| 3: zebrafish_AUG_a2 | 48.97  | 50.70  | 100.00 |

Aug-a Aug Domain

|                   |    |                                                     |    |
|-------------------|----|-----------------------------------------------------|----|
| hAug_a_AugDomain  | 1  | -----                                               | 60 |
| zAug_a1_AugDomain | 1  | -----                                               | 60 |
| zAug_a2_AugDomain | 1  | -----                                               | 60 |
| hAug_a_AugDomain  | 61 | LVLLCTAAQSDASAKVETLREHREHRENSADDESA-----QRTSAPFPHPT | 72 |
| zAug_a1_AugDomain | 61 | LVLLCTAAQSDASAKVETLREHREHRENSADDESA-----QRTSAPFPHPT | 72 |
| zAug_a2_AugDomain | 61 | LVLLCTAAQSDASAKVETLREHREHRENSADDESA-----QRTSAPFPHPT | 70 |

Percent Identity Matrix - created by Clustal2.1

|                      |        |        |        |
|----------------------|--------|--------|--------|
| 1: hAug_a_AugDomain  | 100.00 | 68.57  | 72.86  |
| 2: hAug_a_AugDomain  | 68.57  | 100.00 | 78.57  |
| 3: hAug_a2_AugDomain | 72.86  | 78.57  | 100.00 |

Full-Length Aug-β

|                 |     |                                                     |     |
|-----------------|-----|-----------------------------------------------------|-----|
| human_Aug_b     | 1   | -----                                               | 35  |
| zebrafish_Aug_b | 1   | -----                                               | 35  |
| human_Aug_b     | 36  | KVLDKPKPFLFLPAAGAKTSCSSAETPRSSNLRKRFKHEHGEVYSPSSSHH | 94  |
| zebrafish_Aug_b | 59  | YSVQSDAKSSKENTAPLPEKSRPTEIPRDTSKKRFLEHFAAGVYSPSSSHH | 117 |
| human_Aug_b     | 95  | HRLYNTRDCTIPAHYKRCARLLRLAGSQRTE--                   | 129 |
| zebrafish_Aug_b | 118 | HRLYNTRDCTIPAHYKRCARLLRLAGSQRTE--                   | 152 |

percent identical: 41.29%

Aug-β Aug Domain

|                  |    |                                                     |    |
|------------------|----|-----------------------------------------------------|----|
| hAug_b_AugDomain | 1  | -----                                               | 59 |
| zAug_b_AugDomain | 1  | -----                                               | 60 |
| hAug_b_AugDomain | 60 | LVLLCTAAQSDASAKVETLREHREHRENSADDESA-----QRTSAPFPHPT | 72 |
| zAug_b_AugDomain | 61 | LVLLCTAAQSDASAKVETLREHREHRENSADDESA-----QRTSAPFPHPT | 73 |

percent identical: 69.44%

B

Zebrafish Ltk Primary Sequence:

```

MDYITRQTFVVKLALFIFTVVRSSCALLEKAAESVPHNPLQSSPAEDSDVSPCDFESPSCS
WTLSSHSTGGGEWFIITSAQHRNRRDTPQIRDYSTGKSEGHFLLKPSSSHLSAARCSFH
MTSPVVLSSGPFCHLQARFQPEPHAGNISAFVKHTDSIDIKPIDLTIKEQESDSSQWEV
LEAVIQGLNEPFQVTVQYSAAGSHVGFALFDSLELRKNCVMGDDYVDLGSDEKYSLSLQC
HSGGCIKQRVCFHDTDCPEGEDEGLICSTLPLGSCYCFELGSCGWSAADTQSSWRLVSG
QQLIEDTHLLGTTLKNTQGHFLFLKVRGHDREALVQSPALPSTISNQDCQLQFSLYRY
GDFNGTVLLSVVESGASAPALIWERSGHKDAWQEIITLPIITELNGFHLKVQAFWTSGSK
ADIALDDISLSAACFDTELNELLHEGLPHDLDFSLPEPSASEASPIITWFTSCGASGPF
GPTQAQCDAYSANTVSVVVGKGLRQVQMKVPAINTYKISAYGAAGGKAKNHNKRS
HGVIISATFPLEKGDILYLIGHQGEDACPRGNPQTHKICLGESSVIEDGFDSDGSALKW
AGGGGGGGGATYIYRMENQPLPLLAAGGGKAYLEDPSSQDQSFREQYENDTIVSGV
SGRSGAAGGGGWSVSSLSWAGKSLVGGGGSSCPALSVLQWATFGGFGGGGACSA
GGGGGGRGCDAPLLDDISADGQDGLSFVHPMGKIFLQSLAAMESHGAEIVVYLNCSHC
KTQSCKRDEDTKLLCLCDSDEVLADPNVTCAGTKHSLCQFINKHLQHNSSPLVCPPLVV
PMGSLADGPPSLVFMVAVSVTVVTVGVVLTFCASLTLIYRKNHHLHAVRIRLQSPYKLS
KIRSSITIMTDYNPYGFYFGKAASLSELKEVPRKNITLLRALGHGAFGEVYEGQVIGMNGE
NTAMQVAIKTLPEICSEQDEMDFLMEALIMSKFSHQNIIVRCIGVSLQILPRFILLELMTG
GDMKSFRLNRPRTHSSLSMLLELHMARDIALGCRYLEENHFHRDIAARNCLLTCPG
PDRVAKIGDFGMARDIYRASRYRKGGRAMLPVKWMPPEAFLEGIPTCKTDTWVSGVLLWE
IFSLGYMPYPCKTNQEVLEFVTGGGRMDPKSCPGPVYRIMTQCWQHCPEHRPNFTTILE
RINYCTQDPDVTINTPLPVECGPPVEEGGTVIRPDGSGSMTPLLVARSLSQDASPRASIT
SVTPQALKPRLQRPVHLTQEVGTRETLPCWAEVPPASGVCVCPWLVQVPEHRPCSR
SSSSGSQKLNKTKNLWNPYGSWVLESFGRKSAALCHTQSMPLSCNPTSVSAPSSTSEH
TDPVVEVNVANVSASPPSAAPSQTTLPTAAPSRSKSPGAGVSLATVMDLAKLQSFPCG
NVNYAYDEQSYETESLPVVVSKSLPESTSAATSSVALSQASSFTHKPLVKRHSYGH
DVRRYTQPEKPTRDRDGSFSLSEDSLVTPV

```

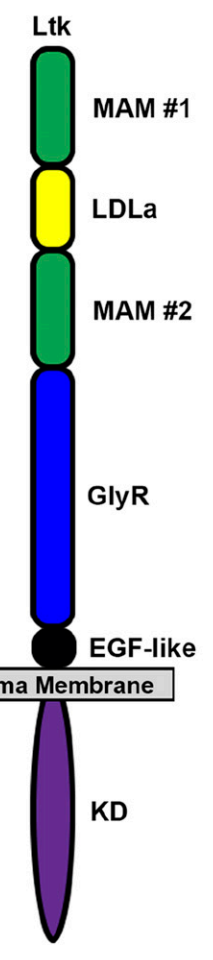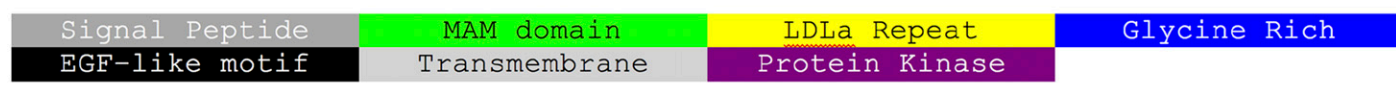

Sequence Alignment

|                   |     |                                                        |     |
|-------------------|-----|--------------------------------------------------------|-----|
| MAM #1            |     |                                                        |     |
| hALK_MAM_1        | 1   | LEDCDFEFLVYPPHDLRQCSNWRRIPESSQMDLDCGARRKEMPSSFLLL      | 60  |
| zLtk_MAM_1        | 1   | STLSEKSEVTSSEHPT---GRTSAGDHS---NRDQVTRVYQKSGREHLL      | 55  |
| hALK_MAM_1        | 61  | HTLSEKSEVTSSEHPTLAVVHRLQSGRYLQGLFNEAR---               | 110 |
| zLtk_MAM_1        | 56  | KPSSSHLSAARCSHMTSVLSSCPTEHQLARQPEHAGNISAFVKHTDSIDIKP   | 114 |
| hALK_MAM_1        | 111 | -HLLMPTPRGQTVLQKRGDPNFRVALDISSSNLSL---VYFPAKNGSE       | 164 |
| zLtk_MAM_1        | 115 | DITIKKQESRQVYVGLVGLDPEFVYVYSSSHSHPLELSEGLKQW           | 171 |
| LDLa              |     |                                                        |     |
| hALK_LDLa         | 1   | ---LQETLWHTVVLQDQEDFQCAQDHEGCKAK                       | 37  |
| zLtk_LDLa         | 1   | DCEKYHSEQHSGCTIKQVDEHTDCPEDEKELIG-                     | 39  |
| MAM #2            |     |                                                        |     |
| hALK_MAM_2        | 1   | FKLHSDVQVTLSPPTKQVH-----TKDINQVQVALLCTVTPVA            | 51  |
| zLtk_MAM_2        | 1   | SYCFELSGDSSAADTQSSWRLVSGQQLIEDTHLLGTTLKNTQGHFLFLKVRGHD | 57  |
| hALK_MAM_2        | 52  | SEKTTTATTAPKSSPTEHRLRVEHVEVIVVHKTQGRVHVVAEY            | 111 |
| zLtk_MAM_2        | 58  | SEKTTTATTAPKSSPTEHRLRVEHVEVIVVHKTQGRVHVVAEY            | 114 |
| hALK_MAM_2        | 112 | GLLQVHVEVIVVHKTQGRVHVVAEY                              | 159 |
| zLtk_MAM_2        | 115 | WKADQETTELTELQVHVEVIVVHKTQGRVHVVAEY                    | 162 |
| GlyR              |     |                                                        |     |
| human_ALK_GlyR    | 1   | GGGGGGGATYIYRMENQPLPLLAAGGGKAYLEDPSSQDQSFREQYENDTIVSGV | 56  |
| human_Ltk_GlyR    | 1   | GGGGGGGATYIYRMENQPLPLLAAGGGKAYLEDPSSQDQSFREQYENDTIVSGV | 60  |
| zebrafish_Ltk_G.. | 1   | GGGGGGGATYIYRMENQPLPLLAAGGGKAYLEDPSSQDQSFREQYENDTIVSGV | 60  |
| human_ALK_GlyR    | 57  | NSGAAGGGGNDNLSLQAGTATSHSPEKMKWNETKGGGGGSSGSSG          | 116 |
| human_Ltk_GlyR    | 61  | NSGAAGGGGNDNLSLQAGTATSHSPEKMKWNETKGGGGGSSGSSG          | 120 |
| zebrafish_Ltk_G.. | 61  | NSGAAGGGGNDNLSLQAGTATSHSPEKMKWNETKGGGGGSSGSSG          | 120 |
| human_ALK_GlyR    | 117 | GGGGGRRG                                               | 125 |
| human_Ltk_GlyR    | 121 | GGGGGRRG                                               | 129 |
| zebrafish_Ltk_G.. | 121 | GGGGGRRG                                               | 129 |

Percent Identical: 21.5%

Percent Identical: 37.5%

Percent Identical: 28.0%

Percent Identity Matrix - created by Clustal2.1

|                       |        |        |        |
|-----------------------|--------|--------|--------|
| 1: human_Ltk_GlyR     | 100.00 | 60.00  | 59.69  |
| 2: human_ALK_GlyR     | 60.00  | 100.00 | 64.00  |
| 3: zebrafish_Ltk_GlyR | 59.69  | 64.00  | 100.00 |

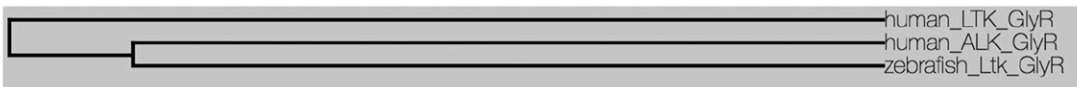

Fig. S1. (Continued)

C

Alk

Sequence ID: Query\_44940 Length: 426 Number of Matches: 2

Range 1: 99 to 168 [Graphics](#) ▼ Next Match ▲ Previous Match

| Score        | Expect | Identities  | Gaps     | Strand    |
|--------------|--------|-------------|----------|-----------|
| 130 bits(70) | 2e-34  | 70/70(100%) | 0/70(0%) | Plus/Plus |

Query 1 GTGTTTCAGCTGTCAGTGGATATTTACACCTGTGGAGCGACAGGCAAGATGGCCCA 60  
 Sbjct 99 GTGTTTCAGCTGTCAGTGGATATTTACACCTGTGGAGCGACAGGCAAGATGGCCCA 158

Query 61 ACACCAACCC 70  
 Sbjct 159 ACACCAACCC 168

Range 2: 173 to 217 [Graphics](#) ▼ Next Match ▲ Previous Match ▲ First Match

| Score         | Expect | Identities  | Gaps     | Strand    |
|---------------|--------|-------------|----------|-----------|
| 84.2 bits(45) | 1e-20  | 45/45(100%) | 0/45(0%) | Plus/Plus |

Query 136 GGGATCCAAATGTGGCAGGTTCCAGAGACAAGGAATACAGGTAC 180  
 Sbjct 173 GGGATCCAAATGTGGCAGGTTCCAGAGACAAGGAATACAGGTAC 217

Amino Acid Alignment  
 WT: 370 WIFHTCGATGQDGPPTQCSNSYRNTNVNVTGKGFPGKIOMWQVPETRKYRITAYGA  
 ALK KO: 370 WIFHTCGATGQDGPPTRLGSKCGRFQRQNGTGRHMEQLVDAVFRWRTSHMGCT-

▲  
stop

Ltk

Sequence ID: Query\_68687 Length: 356 Number of Matches: 1

Range 1: 64 to 230 [Graphics](#) ▼ Next Match ▲ Previous Match

| Score         | Expect | Identities   | Gaps       | Strand    |
|---------------|--------|--------------|------------|-----------|
| 252 bits(136) | 4e-71  | 166/178(93%) | 11/178(6%) | Plus/Plus |

Query 46 GCAGATGTAGTTTCACATGACCAAGTCCTGTTCTCAGCAGTGGCCATTTTGTCAATC 105  
 Sbjct 64 GCAGATGTAGTTTCACATGACCAAGTCCTGTTCTCAGCAGTGGCCATTTTGTCAATC 123

Query 106 TCCAACCTGCTGCTTTCAACCAAGCCACAGCCTGGAACATATCAGCCTTCGTGAAGC 165  
 Sbjct 124 TCCAACCTGCTGCTTTCAACCAAGCCACAGCCTGGAACATATC-----ACC 172

Query 166 ACACCGACTTACCGACATCAAAACCAATTGACCTTACAATCAAAGAACAAAGAAAGCGA 223  
 Sbjct 173 ACACCGACTTATCGACATCAAAACCAATTGACCTTACAATCAAAGAACAAAGAAAGCGA 230

Amino Acid Alignment  
 WT: 115 RCFHMTSPVVLSSGPFCHLQARFQPEPHAGNISAFVKHTDSTDIKPIDLTIKEQES  
 LTK KO: 115 RCFHMTSPVVLSSGPFCHLQARFQPEPHAGNISAHRLYRHQTH-

▲  
stop

aug-a1

Sequence ID: Query\_7615 Length: 318 Number of Matches: 1

Range 1: 98 to 233 [Graphics](#) ▼ Next Match ▲ Previous Match

| Score        | Expect | Identities   | Gaps        | Strand     |
|--------------|--------|--------------|-------------|------------|
| 150 bits(81) | 8e-41  | 131/152(86%) | 16/152(10%) | Plus/Minus |

Query 2 CACTCTGGTTTCGGGAGAGATGCGCGCGCTGCCAGCCCGGTGCTGTAATGGGCTCGT 61  
 Sbjct 233 CACTCTGGTTTCGGGAGAGATGCGCGCGCTGCCAGCCCGG-----GGCTCGT 186

Query 62 ATGTGTAATCTGCACTGCCGACAAAGCGATGCCAGCCGAAACAAAGTGGAGAAAACGCT 121  
 Sbjct 185 ATGTGTAATCTGCAAT-C-GTT-AAT-CGATGCCAGCCGAAACAAAGTGGAGAAAACGCT 130

Query 122 CAGACGGATCATGGAATCATGAGACAGGTGG 153  
 Sbjct 129 CAGACGGATCATGGAATCATGAGACAGGTGG 98

Amino Acid Alignment  
 WT: 1 MRALRAPVLMGLVLLICTAAQSDASANKVEKTLRRIMEIMRQVENSADESAQKTESAPEPKDT  
 AugKO: 1 MRALRAPGLVLLICNR-

▲  
stop

aug-a2

Sequence ID: Query\_210167 Length: 411 Number of Matches: 1

Range 1: 98 to 318 [Graphics](#) ▼ Next Match ▲ Previous Match

| Score         | Expect | Identities   | Gaps      | Strand     |
|---------------|--------|--------------|-----------|------------|
| 335 bits(181) | 1e-95  | 213/227(94%) | 8/227(3%) | Plus/Minus |

Query 134 CACCTTTCAGCATGAGTGCAGTGCGCCACCTGTC-TTC-ATAGGCTCCTACTGCTGAT 191  
 Sbjct 318 CACCTTTCAGCATGAGTGCAGTGCGCCACCTGTCCTACTTTAGGGCTCCTACTGCTGAT 259

Query 192 CCTCACCAACCGCTACTGCAACCGAGAGACAGAGACGAAACAGTCTGCTGGAGCTCTT 251  
 Sbjct 258 CCTCACCAACCGC-----AACCGRAGRACGGGACGAAACAGTCTGCTGGAGCTCTT 205

Query 252 AATGGACAGATGAGACAGACACAGGAGCATCACAGTGGAGGAAACACACAGCATCCTCC 311  
 Sbjct 204 AATGGAGAGATGAGACAGACACAGGAGCATCACAGTGGAGGAAACACACAGCATCCTCC 145

Query 312 TCAGATCATGAGCATTCGCTGGAAACAAAGACGTTAATAAGTCA 358  
 Sbjct 144 TCAGATCATGAGCATTCGCTGGAAACAAAGACGTTAATAAGTCA 98

Amino Acid Alignment  
 WT: 1 MCFALSLSIYKHTGTPPNKRLNSALKRNRATVRLDIGRGSGLCPPFSMSAVRPPVF IGLLLLL  
 AugKO: 1 MCFALSLSIYKHTGTPPNKRLNSALKRNRATVRLDIGRGSGLCPPFSMSAVRPPVLL-

▲  
stop

aub-b

Sequence ID: Query\_197261 Length: 418 Number of Matches: 2

Range 1: 164 to 275 [Graphics](#) ▼ Next Match ▲ Previous Match

| Score        | Expect | Identities   | Gaps      | Strand    |
|--------------|--------|--------------|-----------|-----------|
| 183 bits(99) | 3e-50  | 112/117(96%) | 5/117(4%) | Plus/Plus |

Query 106 ACTCTGCTTAATCTAATCTGCAAGTGTGGGAAAAGCCCGCTCCAGACGCGTCACC 165  
 Sbjct 164 ACTCTGCTTAATCTAATCTGCAAGTGTGGGAAAAGCCCGCTCCA-----GTCACC 218

Query 166 AGTGGCCTTACTCTGTATCTCAAGATGTAAGTTTCTCGCGTAAAACACTGCA 222  
 Sbjct 219 AGTGGCCTTACTCTGTATCTCAAGATGTAAGTTTCTCGCGTAAAACACTGCA 275

Range 2: 95 to 155 [Graphics](#) ▼ Next Match ▲ Previous Match ▲ First Match

| Score        | Expect | Identities | Gaps     | Strand    |
|--------------|--------|------------|----------|-----------|
| 108 bits(58) | 2e-27  | 60/61(98%) | 0/61(0%) | Plus/Plus |

Query 1 ATCGGGCTGAGAAGATGGCACATCTTGTGAGTATGATCTTTTGCTCATCACCTCC 60  
 Sbjct 95 ATCGGGCTGAGAAGATGGCACATCTTGTGAGTATGATCTTTTGCTCATCACCTCC 154

Query 61 A 61  
 Sbjct 155 A 155

Amino Acid Alignment  
 WT: 2 RAEKRWHILLSMILLITSSQCMDSKEVKESEKRLNLLILQVIGEPASRRVTSGLYSVSQDAKFPSS  
 AugKO: 2 RAEKRWHILLSMILLITSTSI TLLNLLILQVIGEPASSHOWPLLCISRC-

▲  
stop

Fig. S1. (A) Comparison of the full-length and augmentor domain primary sequence of zebrafish and human augmentors. (B) Ltk primary sequence with domains highlighted. Sequence comparison of Ltk domains with their human ALK counterparts shows that the GlyR region of Ltk is more closely related to human ALK than to LTK. (C) Sequencing of knockout Alk, Ltk, and augmentor fish resulting in frame-shift mutations (red text denotes the mutant amino acid sequences) and subsequent successful introduction of a premature stop codon (red arrowheads).
